# Supplementary material
Source: PubMed Central journal article supplement (PMC8118874)
Supplement: 0458.pdf [file 0458.pdf]

**On-line Table: Demographic information for patients with tumor**

| Surgery/<br>Patient<br>No. | Sex | Age<br>(years) | Handedness   | Pathology                     | Lesion Location                   | Intraoperative<br>Mapping            | Preoperative Neurology<br>Report: Speech      | Postoperative Neurology<br>Report: Speech     | Language Tasks         |
|----------------------------|-----|----------------|--------------|-------------------------------|-----------------------------------|--------------------------------------|-----------------------------------------------|-----------------------------------------------|------------------------|
| No Prior                   |     |                |              |                               |                                   |                                      |                                               |                                               |                        |
| 1                          | F   | 48             | Left         | Low grade                     | Right insula                      | Yes, discordant with fMRI prediction | Dysarthria                                    | Dysarthria                                    | Letter, verb           |
| 2                          | M   | 60             | Right        | Anaplastic astrocytoma        | Left insula                       | Yes, concordant with fMRI prediction | Speech hesitation and word-finding difficulty | Speech hesitation and word-finding difficulty | Letter, verb           |
| 3                          | F   | 55             | Right        | Metastatic adenocarcinoma     | Left frontal                      | No                                   | Aphasia                                       | Aphasia with dysarthria                       | Letter                 |
| 4                          | F   | 50             | Left         | Anaplastic oligodendroglioma  | Right frontotemporal              | No                                   | Fluent                                        | Fluent                                        | Category, letter, verb |
| 5                          | F   | 65             | Right        | Glioblastoma multiforme       | Right temporoparietal             | No                                   | Dysarthria                                    | Dysarthria                                    | Category, letter, verb |
| 6                          | F   | 52             | Left         | Metastatic from anal melanoma | 2 Right frontal, 1 right insula   | No                                   | Fluent                                        | Fluent                                        | Category, letter, verb |
| 7                          | M   | 73             | Right        | Glioblastoma multiforme       | Left frontal                      | No                                   | Fluent                                        | Fluent                                        | Letter                 |
| 8                          | F   | 30             | Right        | Anaplastic astrocytoma        | Left insula, frontal and temporal | No                                   | Word-finding difficulties and perseveration   | N/A                                           | Category, letter, verb |
| 9                          | M   | 61             | Ambidextrous | Glioblastoma multiforme       | Left frontal                      | No                                   | Dysarthria                                    | Dysarthria with aphasia                       | Letter                 |
| Prior                      |     |                |              |                               |                                   |                                      |                                               |                                               |                        |
| 1                          | F   | 28             | Right        | Oligodendroglioma             | Right frontal                     | No                                   | Fluent                                        | Fluent                                        | Letter, verb           |
| 2                          | M   | 34             | Left         | Anaplastic astrocytoma        | Right frontal                     | No                                   | Fluent                                        | Fluent                                        | Letter                 |
| 3                          | M   | 39             | Left         | Glioblastoma multiforme       | Right frontal                     | No                                   | Dysarthria                                    | Dysarthria                                    | Category, letter, verb |
| 4                          | F   | 39             | Right        | Metastatic adenocarcinoma     | Left frontal and right occipital  | No                                   | Fluent                                        | Fluent                                        | Letter                 |

**Note:**—N/A indicates not applicable.
